# Supplementary material for: Assessment of Lead and Mercury Exposure Levels in the General Population of Korea Using Integrated National Biomonitoring Data
Source: MDPI journal article supplement (doi:10.3390/ijerph18136932), 2021-06-28
Supplement: s1 [file s1]

Supplementary Materials

Table S1. Concentration of blood lead in KNEHS

| Factor           | Level                                | Blood Pb of KNEHS (μg/dL) |                    |                     |                    |                     |                    |
|------------------|--------------------------------------|---------------------------|--------------------|---------------------|--------------------|---------------------|--------------------|
|                  |                                      | 1st stage ('09-'11)       |                    | 2nd stage ('12-'14) |                    | 3rd stage ('15-'17) |                    |
|                  |                                      | n (%)                     | Weight GM (95% CI) | n (%)               | Weight GM (95% CI) | n (%)               | Weight GM (95% CI) |
| Total            | Crude                                |                           | 1.77(1.72–1.81)    |                     | 1.94(1.89–1.99)    |                     | 1.60(1.56–1.64)    |
|                  | Age standardized                     | 6311(38.1)                | 1.81(1.77–1.85)    | 6478(39.1)          | 1.96(1.92–2.01)    | 3787(22.8)          | 1.61(1.57–1.65)    |
|                  | Adjusted                             |                           | 1.77(1.73–1.81)    |                     | 1.94(1.90–1.98)    |                     | 1.60(1.56–1.64)    |
| Sex              | Male                                 | 2928(46.4)                | 2.22(2.16–2.27)    | 2774(42.8)          | 2.32(2.26–2.38)    | 1648(43.5)          | 1.89(1.84–1.95)    |
| Age standardized | Female                               | 3383(53.6)                | 1.49(1.45–1.53)    | 3704(57.2)          | 1.67(1.63–1.71)    | 2139(56.5)          | 1.37(1.34–1.41)    |
|                  | p-value                              |                           | <0.001             |                     | <0.001             |                     | <0.001             |
| Sex              | Male                                 | 2928(46.4)                | 2.02(1.96–2.09)    | 2774(42.8)          | 2.20(2.14–2.26)    | 1648(43.5)          | 1.78(1.73–1.84)    |
|                  | Female                               | 3383(53.6)                | 1.55(1.51–1.60)    | 3704(57.2)          | 1.72(1.68–1.76)    | 2139(56.5)          | 1.44(1.39–1.49)    |
|                  | p-value                              |                           | <0.001             |                     | <0.001             |                     | <0.001             |
| Age (yr)         | 18–29                                | 747(11.8)                 | 1.33(1.25–1.41)    | 537(8.3)            | 1.50(1.43–1.57)    | 281(7.4)            | 1.25(1.16–1.34)    |
|                  | 30–39                                | 1184(18.8)                | 1.61(1.55–1.67)    | 1056(16.3)          | 1.75(1.69–1.82)    | 542(14.3)           | 1.44(1.38–1.50)    |
|                  | 40–49                                | 1336(21.2)                | 1.81(1.76–1.87)    | 1226(18.9)          | 1.98(1.91–2.05)    | 621(16.4)           | 1.57(1.51–1.63)    |
|                  | 50–59                                | 1496(23.7)                | 2.12(2.06–2.19)    | 1439(22.2)          | 2.26(2.18–2.33)    | 883(23.3)           | 1.88(1.81–1.96)    |
|                  | 60–69                                | 1113(17.6)                | 2.18(2.10–2.27)    | 1335(20.6)          | 2.25(2.15–2.36)    | 935(24.7)           | 1.90(1.81–1.99)    |
|                  | ≥70                                  | 435(6.9)                  | 2.05(1.91–2.20)    | 885(13.7)           | 2.24(2.13–2.35)    | 525(13.9)           | 1.80(1.68–1.93)    |
|                  | p-value                              |                           | <0.001             |                     | <0.001             |                     | <0.001             |
| Region           | Seoul/Gyeonggi do/Incheon/gangwon-do | 2504(39.7)                | 1.76(1.70–1.82)    | –                   |                    | –                   |                    |
|                  | Chungcheongdo                        | 794(12.6)                 | 1.78(1.68–1.89)    | –                   |                    | –                   |                    |
|                  | Jeollado                             | 804(12.7)                 | 1.86(1.76–1.97)    | –                   |                    | –                   |                    |
|                  | Gyeongsangdo                         | 2042(32.4)                | 1.74(1.68–1.81)    | –                   |                    | –                   |                    |
|                  | Jejudο                               | 167(2.6)                  | 1.68(1.53–1.86)    | –                   |                    | –                   |                    |
|                  |                                      |                           | 0.317              |                     |                    |                     |                    |
| Smoke            | Currently                            | 1417(22.5)                | 2.01(1.95–2.08)    | 1161(17.9)          | 2.16(2.09–2.23)    | 604(15.9)           | 1.86(1.77–1.95)    |

|                 |                  |            |                 |   |            |                 |   |            |                 |    |
|-----------------|------------------|------------|-----------------|---|------------|-----------------|---|------------|-----------------|----|
|                 | Former           | 1077(17.1) | 1.83(1.75–1.92) | b | 1058(16.3) | 1.99(1.91–2.07) | b | 760(20.1)  | 1.64(1.57–1.72) | b  |
|                 | Never            | 3815(60.5) | 1.66(1.61–1.71) | c | 4259(65.7) | 1.86(1.81–1.91) | c | 2423(64.0) | 1.52(1.47–1.56) | c  |
|                 | <i>p</i> -value  |            | <0.001          |   |            | <0.001          |   |            | <0.001          |    |
| Drink           | Currently        | 3695(58.6) | 1.88(1.83–1.93) | a | 3824(59.0) | 2.01(1.97–2.06) | a | 2549(67.3) | 1.63(1.58–1.67) | a  |
|                 | Former           | 623(9.9)   | 1.64(1.56–1.72) | b | 424(6.5)   | 1.80(1.68–1.93) | b | 473(12.5)  | 1.51(1.44–1.59) | b  |
|                 | Never            | 1986(31.5) | 1.59(1.54–1.65) | b | 2230(34.4) | 1.82(1.76–1.88) | b | 765(20.2)  | 1.54(1.47–1.61) | ab |
|                 | <i>p</i> -value  |            | <0.001          |   |            | <0.001          |   |            | 0.004           |    |
| House income    | Low              | 1544(24.9) | 1.76(1.68–1.84) |   | 1827(28.2) | 1.95(1.88–2.03) |   | 715(18.9)  | 1.66(1.55–1.76) |    |
|                 | Middle low       | 1728(27.8) | 1.73(1.68–1.79) |   | 2979(46.0) | 1.95(1.90–1.99) |   | 1524(40.2) | 1.62(1.56–1.68) |    |
|                 | Middle high      | 1317(21.2) | 1.77(1.71–1.83) |   | 1614(24.9) | 1.91(1.84–1.98) |   | 936(24.7)  | 1.58(1.51–1.65) |    |
|                 | High             | 1624(26.1) | 1.81(1.74–1.89) |   | 58(0.9)    | 1.99(1.73–2.30) |   | 612(16.2)  | 1.56(1.49–1.64) |    |
|                 | <i>p</i> -value  |            | 0.420           |   |            | 0.712           |   |            | 0.421           |    |
| Education level | Below elementary | 1217(19.3) | 1.93(1.82–2.04) | a | 1420(21.9) | 2.09(2.00–2.19) | a | 1273(33.6) | 1.60(1.54–1.67) |    |
|                 | Middle           | 905(14.3)  | 1.89(1.82–1.97) | a | 874(13.5)  | 2.04(1.94–2.14) | a | 1164(30.7) | 1.56(1.50–1.62) |    |
|                 | High             | 2042(32.4) | 1.79(1.73–1.84) | a | 1948(30.1) | 1.97(1.91–2.03) | a | 851(22.5)  | 1.64(1.57–1.71) |    |
|                 | Above college    | 2147(34.0) | 1.67(1.61–1.72) | b | 2236(34.5) | 1.86(1.80–1.92) | b | 499(13.2)  | 1.63(1.56–1.70) |    |
|                 | <i>p</i> -value  |            | <0.001          |   |            | 0.002           |   |            | 0.184           |    |

All estimates, except crude and age standardized, are adjusted by sex, age, house income, smoking status, drinking status, education level.

GM(95% CI): geometric means (95% Confidence Interval).

abc: Bonferroni post hoc grouping; estimates with the same letter are not significantly different.

**Table S2.** Concentration of blood lead in KNHANES.

| Factor | Level            | Blood Pb of KNHANES ( $\mu\text{g/dL}$ ) |                    |                     |                    |                 |                    |                     |                    |
|--------|------------------|------------------------------------------|--------------------|---------------------|--------------------|-----------------|--------------------|---------------------|--------------------|
|        |                  | 4th stage ('08–'09)                      |                    | 5th stage ('10–'12) |                    | 6th stage ('13) |                    | 7th stage ('16–'17) |                    |
|        |                  | n (%)                                    | Weight GM (95% CI) | n (%)               | Weight GM (95% CI) | n (%)           | Weight GM (95% CI) | n (%)               | Weight GM (95% CI) |
| Total  | Crude            |                                          | 2.31(2.27–2.34)    |                     | 2.12(2.09–2.15)    |                 | 1.94(1.88–1.99)    |                     | 1.62(1.59–1.65)    |
|        | Age standardized | 3996(21.2)                               | 2.35(2.31–2.39)    | 6050(32.1)          | 2.16(2.13–2.19)    | 1995(10.6)      | 1.98(1.93–2.03)    | 4831(25.6)          | 1.63(1.60–1.66)    |
|        | Adjusted         |                                          | 2.30(2.27–2.34)    |                     | 2.11(2.09–2.14)    |                 | 1.92(1.88–1.97)    |                     | 1.61(1.59–1.64)    |

|          |                                    |            |                 |     |            |                 |     |            |                 |   |            |                 |
|----------|------------------------------------|------------|-----------------|-----|------------|-----------------|-----|------------|-----------------|---|------------|-----------------|
| Sex      | Male                               | 1995(49.9) | 2.78(2.73–2.84) |     | 2976(49.2) | 2.54(2.50–2.59) |     | 996(49.9)  | 2.29(2.23–2.36) |   | 2149(44.5) | 1.86(1.82–1.90) |
|          | Female                             | 2001(50.1) | 2.00(1.95–2.04) |     | 3074(50.8) | 1.85(1.82–1.88) |     | 999(50.1)  | 1.70(1.64–1.75) |   | 2682(55.5) | 1.43(1.40–1.46) |
|          | <i>p</i> -value                    |            | <0.001          |     |            | <0.001          |     |            | <0.001          |   |            | <0.001          |
| Sex      | Male                               | 1995(49.9) | 2.62(2.55–2.68) |     | 2976(49.2) | 2.39(2.34–2.44) |     | 996(49.9)  | 2.17(2.10–2.25) |   | 2149(44.5) | 1.78(1.74–1.82) |
|          | Female                             | 2001(50.1) | 2.04(1.98–2.09) |     | 3074(50.8) | 1.87(1.83–1.92) |     | 999(50.1)  | 1.71(1.65–1.77) |   | 2682(55.5) | 1.47(1.43–1.50) |
|          | <i>p</i> -value                    |            | <0.001          |     |            | <0.001          |     |            | <.001           |   |            | <0.001          |
| Age (yr) | 18–29                              | 789(19.7)  | 1.85(1.79–1.91) | a   | 1211(20.0) | 1.64(1.59–1.68) | a   | 412(20.7)  | 1.51(1.44–1.58) | a | 598(12.4)  | 1.21(1.16–1.25) |
|          | 30–39                              | 804(20.1)  | 2.20(2.14–2.27) | b   | 1211(20.0) | 1.98(1.93–2.03) | b   | 401(20.1)  | 1.82(1.74–1.91) | b | 842(17.4)  | 1.44(1.40–1.49) |
|          | 40–49                              | 800(20.0)  | 2.45(2.37–2.53) | c   | 1213(20.0) | 2.23(2.17–2.29) | c   | 391(19.6)  | 2.05(1.96–2.13) | c | 937(19.4)  | 1.64(1.59–1.69) |
|          | 50–59                              | 791(19.8)  | 2.65(2.58–2.73) | d   | 1212(20.0) | 2.49(2.42–2.55) | d   | 404(20.3)  | 2.22(2.13–2.30) | c | 969(20.1)  | 1.88(1.83–1.94) |
|          | 60–69                              | 492(12.3)  | 2.54(2.43–2.65) | cd  | 1018(16.8) | 2.44(2.36–2.52) | e   | 343(17.2)  | 2.08(1.95–2.21) | c | 771(16.0)  | 1.89(1.82–1.96) |
|          | ≥70                                | 320(8.0)   | 2.44(2.30–2.59) | bcd | 185(3.1)   | 2.29(2.14–2.46) | bcd | 44(2.2)    | 2.24(2.00–2.50) | c | 714(14.8)  | 1.92(1.84–2.00) |
|          | <i>p</i> -value                    |            | <0.001          |     |            | <0.001          |     |            | <0.001          |   |            | <0.001          |
| Region   | Seoul/Gyeonggido/Incheon/gangwondo | 1884(47.1) | 2.29(2.24–2.34) | a   | 3264(54.0) | 2.07(2.03–2.10) | a   | 1112(55.7) | 1.92(1.85–1.98) | a | 2515(52.1) | 1.58(1.55–1.62) |
|          | Chungcheongdo                      | 476(11.9)  | 2.35(2.23–2.48) | a   | 576(9.5)   | 2.27(2.18–2.36) | b   | 227(11.4)  | 1.87(1.73–2.04) | a | 600(12.4)  | 1.68(1.59–1.76) |
|          | Jeollado                           | 505(12.6)  | 2.42(2.33–2.52) | a   | 585(9.7)   | 2.38(2.29–2.47) | b   | 176(8.8)   | 2.22(2.10–2.35) | b | 505(10.5)  | 1.80(1.69–1.92) |
|          | Gyeongsangdo                       | 1052(26.3) | 2.31(2.25–2.38) | a   | 1507(24.9) | 2.09(2.03–2.14) | a   | 436(21.9)  | 1.86(1.76–1.96) | a | 1111(23.0) | 1.61(1.56–1.67) |
|          | Jejudo                             | 79(2.0)    | 1.76(1.56–1.99) | b   | 118(2.0)   | 1.81(1.56–2.10) | a   | 44(2.2)    | 2.09(1.76–2.49) | a | 100(2.1)   | 1.40(1.27–1.55) |
|          |                                    |            | <0.001          |     |            | <0.001          |     |            | <0.001          |   |            | <0.001          |
| Smoke    | Currently                          | 1034(26.0) | 2.55(2.47–2.63) | a   | 1481(25.0) | 2.32(2.26–2.39) | a   | 464(24.6)  | 2.10(2.01–2.19) | a | 923(19.4)  | 1.78(1.73–1.83) |
|          | Former                             | 813(20.4)  | 2.35(2.28–2.42) | b   | 1203(20.3) | 2.11(2.05–2.18) | b   | 344(18.2)  | 1.92(1.83–2.02) | b | 983(20.7)  | 1.63(1.58–1.68) |

|                 |                  |            |                 |   |            |                 |   |            |                 |    |            |                 |
|-----------------|------------------|------------|-----------------|---|------------|-----------------|---|------------|-----------------|----|------------|-----------------|
| Drink           | Never            | 2134(53.6) | 2.18(2.12–2.24) | c | 3232(54.6) | 2.02(1.98–2.07) | b | 1080(57.2) | 1.86(1.80–1.92) | b  | 2853(59.9) | 1.55(1.52–1.58) |
|                 | <i>p</i> -value  |            | <0.001          |   |            | <0.001          |   |            | <0.001          |    |            | <0.001          |
|                 | Currently        | 2974(74.6) | 2.36(2.31–2.40) | a | 4650(78.6) | 2.16(2.13–2.20) | a | 1470(77.7) | 1.95(1.90–2.00) |    | 3532(74.2) | 1.64(1.62–1.67) |
|                 | Former           | 526(13.2)  | 2.17(2.09–2.24) | b | 694(11.7)  | 1.99(1.92–2.07) | b | 264(14.0)  | 1.81(1.70–1.92) |    | 714(15.0)  | 1.50(1.44–1.55) |
|                 | Never            | 485(12.2)  | 2.15(2.06–2.24) | b | 574(9.7)   | 1.91(1.82–1.99) | b | 157(8.3)   | 1.93(1.82–2.05) |    | 517(10.9)  | 1.53(1.47–1.59) |
| House income    | <i>p</i> -value  |            | <0.001          |   |            | <0.001          |   |            | 0.570           |    |            | <0.001          |
|                 | Low              | 700(17.8)  | 2.35(2.26–2.44) |   | 853(14.3)  | 2.18(2.11–2.26) |   | 295(14.8)  | 1.97(1.87–2.08) |    | 853(17.7)  | 1.64(1.59–1.70) |
|                 | Middle low       | 1007(25.7) | 2.33(2.26–2.40) |   | 1594(26.7) | 2.10(2.05–2.16) |   | 541(27.2)  | 1.88(1.80–1.96) |    | 1191(24.7) | 1.64(1.59–1.69) |
|                 | Middle high      | 1104(28.1) | 2.27(2.22–2.33) |   | 1739(29.1) | 2.10(2.05–2.14) |   | 554(27.9)  | 1.97(1.90–2.05) |    | 1329(27.6) | 1.61(1.56–1.65) |
|                 | High             | 1114(28.4) | 2.29(2.23–2.35) |   | 1789(29.9) | 2.10(2.05–2.15) |   | 597(30.0)  | 1.90(1.83–1.97) |    | 1443(30.0) | 1.59(1.55–1.64) |
| Education level | <i>p</i> -value  |            | 0.462           |   |            | 0.284           |   |            | 0.164           |    |            | 0.415           |
|                 | Below elementary | 874(22.0)  | 2.52(2.42–2.62) | a | 977(16.5)  | 2.27(2.18–2.36) | a | 300(15.9)  | 2.05(1.95–2.16) | a  | 875(19.1)  | 1.75(1.68–1.82) |
|                 | Middle           | 467(11.7)  | 2.44(2.35–2.53) | a | 612(10.4)  | 2.26(2.18–2.35) | a | 171(9.0)   | 2.08(1.92–2.24) | a  | 461(10.1)  | 1.71(1.64–1.78) |
|                 | High             | 1498(37.6) | 2.28(2.23–2.34) | b | 2237(37.9) | 2.08(2.04–2.13) | b | 746(39.5)  | 1.93(1.86–2.00) | ab | 1504(32.8) | 1.61(1.57–1.64) |
|                 | Above college    | 1140(28.7) | 2.15(2.08–2.22) | c | 2081(35.2) | 2.02(1.97–2.06) | b | 674(35.6)  | 1.83(1.75–1.90) | b  | 1744(38.0) | 1.56(1.52–1.60) |
| <i>p</i> -value |                  |            | <0.001          |   |            | <0.001          |   |            | 0.004           |    |            | <0.001          |

All estimates, except crude and age standardized, are adjusted by sex, age, house income, smoking status, drinking status, education level.

GM (95% CI): geometric means (95% confidence interval).

abc: Bonferroni post hoc grouping; estimates with the same letter are not significantly different.

**Table S3.** Concentration of blood mercury in KNEHS.

| Factor                     | Level                               | Blood Hg of KNEHS (μg/L) |                    |    |            |                     |            |                     |                 |    |
|----------------------------|-------------------------------------|--------------------------|--------------------|----|------------|---------------------|------------|---------------------|-----------------|----|
|                            |                                     | 1st stage ('09–'11)      |                    |    |            | 2nd stage ('12–'14) |            | 3rd stage ('15–'17) |                 |    |
|                            |                                     | n (%)                    | Weight GM (95% CI) |    | n (%)      | Weight GM (95% CI)  | n (%)      | Weight GM (95% CI)  |                 |    |
| Total                      | Crude                               |                          | 3.08(2.96–3.21)    |    |            | 3.11(3.02–3.21)     |            | 2.75(2.63–2.88)     |                 |    |
|                            | Age standardized                    | 6311(38.1)               | 3.10(2.98–3.22)    |    | 6478(39.1) | 3.12(3.03–3.21)     | 3787(22.8) | 2.77(2.65–2.89)     |                 |    |
|                            | Adjusted                            |                          | 3.10(2.98–3.23)    |    |            | 3.11(3.03–3.20)     |            | 2.75(2.63–2.87)     |                 |    |
| Sex<br>age<br>standardized | Male                                | 2928(46.4)               | 3.67(3.50–3.84)    |    | 2774(42.8) | 3.70(3.57–3.83)     | 1648(43.5) | 3.31(3.13–3.51)     |                 |    |
|                            | Female                              | 3383(53.6)               | 2.64(2.53–2.75)    |    | 3704(57.2) | 2.65(2.56–2.73)     | 2139(56.5) | 2.31(2.21–2.41)     |                 |    |
|                            | <i>p</i> -value                     |                          | <0.001             |    |            | <0.001              |            | <0.001              |                 |    |
| Sex                        | Male                                | 2928(46.4)               | 3.45(3.27–3.64)    |    | 2774(42.8) | 3.48(3.35–3.62)     | 1648(43.5) | 3.13(2.93–3.34)     |                 |    |
|                            | Female                              | 3383(53.6)               | 2.80(2.66–2.94)    |    | 3704(57.2) | 2.79(2.68–2.90)     | 2139(56.5) | 2.42(2.29–2.55)     |                 |    |
|                            | <i>p</i> -value                     |                          | <0.001             |    |            | <0.001              |            | <0.001              |                 |    |
| Age(yr)                    | 18–29                               | 747(11.8)                | 2.25(2.08–2.44)    | a  | 537(8.3)   | 2.28(2.15–2.42)     | a          | 281(7.4)            | 1.85(1.66–2.06) | a  |
|                            | 30–39                               | 1184(18.8)               | 3.11(2.92–3.31)    | b  | 1056(16.3) | 3.05(2.90–3.21)     | bc         | 542(14.3)           | 2.76(2.57–2.96) | b  |
|                            | 40–49                               | 1336(21.2)               | 3.38(3.18–3.60)    | b  | 1226(18.9) | 3.48(3.33–3.64)     | d          | 621(16.4)           | 2.96(2.79–3.14) | bc |
|                            | 50–59                               | 1496(23.7)               | 3.84(3.62–4.08)    | c  | 1439(22.2) | 3.66(3.49–3.84)     | d          | 883(23.3)           | 3.22(3.04–3.41) | c  |
|                            | 60–69                               | 1113(17.6)               | 3.30(3.08–3.53)    | b  | 1335(20.6) | 3.43(3.23–3.65)     | bd         | 935(24.7)           | 3.27(3.01–3.55) | c  |
|                            | ≥70                                 | 435(6.9)                 | 2.94(2.65–3.28)    | b  | 885(13.7)  | 2.89(2.68–3.11)     | c          | 525(13.9)           | 2.76(2.44–3.12) | bc |
|                            | <i>p</i> -value                     |                          | <0.001             |    |            | <0.001              |            | <0.001              |                 |    |
| Region                     | Seoul/Gyeonggido/Incheon/Gangwon-do | 2504(39.7)               | 2.93(2.76–3.11)    | ab | —          |                     |            | —                   |                 |    |
|                            | Chungcheongdo                       | 794(12.6)                | 2.41(2.11–2.76)    | a  | —          |                     |            | —                   |                 |    |
|                            | Jeollado                            | 804(12.7)                | 2.91(2.67–3.17)    | ab | —          |                     |            | —                   |                 |    |
|                            | Gyeongsangdo                        | 2042(32.4)               | 3.85(3.56–4.16)    | c  | —          |                     |            | —                   |                 |    |
|                            | Jejudo                              | 167(2.6)                 | 4.04(3.06–5.32)    | bc | —          |                     |            | —                   |                 |    |
|                            |                                     |                          | <0.001             |    |            |                     |            |                     |                 |    |
| Smoke                      | Currently                           | 1417(22.5)               | 3.32(3.10–3.56)    | a  | 1161(17.9) | 3.38(3.21–3.56)     | a          | 604(15.9)           | 2.90(2.66–3.16) | ab |
|                            | Former                              | 1077(17.1)               | 3.26(3.06–3.48)    | a  | 1058(16.3) | 3.41(3.20–3.62)     | a          | 760(20.1)           | 2.99(2.78–3.22) | a  |
|                            | Never                               | 3815(60.5)               | 2.97(2.83–3.11)    | b  | 4259(65.7) | 2.96(2.86–3.06)     | b          | 2423(64.0)          | 2.63(2.49–2.78) | b  |
|                            | <i>p</i> -value                     |                          | 0.004              |    |            | <0.001              |            | 0.027               |                 |    |
| Drink                      | Currently                           | 3695(58.6)               | 3.27(3.13–3.42)    | a  | 3824(59.0) | 3.26(3.16–3.36)     | a          | 2549(67.3)          | 2.81(2.67–2.95) | a  |

|                 |                  |            |                 |   |            |                 |    |            |                 |    |
|-----------------|------------------|------------|-----------------|---|------------|-----------------|----|------------|-----------------|----|
|                 | Former           | 623(9.9)   | 2.68(2.49–2.89) | b | 424(6.5)   | 2.69(2.46–2.94) | b  | 473(12.5)  | 2.50(2.33–2.68) | b  |
|                 | Never            | 1986(31.5) | 2.90(2.74–3.07) | b | 2230(34.4) | 2.89(2.78–3.01) | b  | 765(20.2)  | 2.66(2.50–2.84) | ab |
|                 | <i>p</i> -value  |            | <0.001          |   |            | <0.001          |    |            | 0.003           |    |
| House income    | Low              | 1544(24.9) | 3.10(2.88–3.34) |   | 1827(28.2) | 2.92(2.77–3.06) | a  | 715(18.9)  | 2.56(2.31–2.84) |    |
|                 | Middle low       | 1728(27.8) | 3.00(2.84–3.15) |   | 2979(46.0) | 3.08(2.98–3.18) | a  | 1524(40.2) | 2.70(2.55–2.86) |    |
|                 | Middle high      | 1317(21.2) | 3.01(2.79–3.26) |   | 1614(24.9) | 3.34(3.20–3.49) | b  | 936(24.7)  | 2.78(2.63–2.95) |    |
|                 | High             | 1624(26.1) | 3.27(3.08–3.49) |   | 58(0.9)    | 3.36(2.63–4.30) | ab | 612(16.2)  | 2.89(2.66–3.14) |    |
|                 | <i>p</i> -value  |            | 0.996           |   |            | <0.001          |    |            | 0.240           |    |
| Education level | Below elementary | 1217(19.3) | 2.86(2.63–3.11) |   | 1420(21.9) | 2.98(2.77–3.20) |    | 1273(33.6) | 2.47(2.31–2.64) | a  |
|                 | Middle           | 905(14.3)  | 3.13(2.91–3.36) |   | 874(13.5)  | 3.00(2.83–3.19) |    | 1164(30.7) | 2.75(2.60–2.91) | b  |
|                 | High             | 2042(32.4) | 3.08(2.92–3.25) |   | 1948(30.1) | 3.13(3.01–3.25) |    | 851(22.5)  | 2.91(2.73–3.11) | b  |
|                 | Above college    | 2147(34.0) | 3.21(3.03–3.39) |   | 2236(34.5) | 3.16(3.05–3.28) |    | 499(13.2)  | 2.98(2.76–3.23) | b  |
|                 | <i>p</i> -value  |            | 0.966           |   |            | 0.403           |    |            | <0.001          |    |

All estimates, except crude and age standardized, are adjusted by sex, age, house income, smoking status, drinking status, education level.

GM (95% CI): geometric means (95% confidence interval).

abc: Bonferroni post hoc grouping; estimates with the same letter are not significantly different.

**Table S4.** Concentration of blood mercury in KNHANES.

| Factor | Level            | Blood Hg of KNHANES (μg/L) |                    |                     |                    |                 |                    |                     |                    |
|--------|------------------|----------------------------|--------------------|---------------------|--------------------|-----------------|--------------------|---------------------|--------------------|
|        |                  | 4th stage ('08–'09)        |                    | 5th stage ('10–'12) |                    | 6th stage ('13) |                    | 7th stage ('16–'17) |                    |
|        |                  | n (%)                      | Weight GM (95% CI) | n (%)               | Weight GM (95% CI) | n (%)           | Weight GM (95% CI) | n (%)               | Weight GM (95% CI) |
| Total  | Crude            |                            | 4.48(4.36–4.60)    |                     | 3.56(3.46–3.65)    |                 | 3.27(3.15–3.39)    |                     | 3.25(3.17–3.34)    |
|        | Age standardized | 3996(21.2)                 | 4.48(4.37–4.61)    | 6050(32.1)          | 3.58(3.49–3.68)    | 1995(10.6)      | 3.30(3.15–3.45)    | 4831(25.6)          | 3.26(3.18–3.35)    |
|        | Adjusted         |                            | 4.48(4.38–4.59)    |                     | 3.56(3.47–3.65)    |                 | 3.25(3.15–3.36)    |                     | 3.25(3.16–3.34)    |
| Sex    | Male             | 1995(49.9)                 | 5.43(5.25–5.62)    | 2976(49.2)          | 4.25(4.11–4.40)    | 996(49.9)       | 3.84(3.62–4.07)    | 2149(44.5)          | 3.91(3.78–4.04)    |

|                     |                                    |            |                 |    |            |                 |     |            |                 |     |            |                 |    |
|---------------------|------------------------------------|------------|-----------------|----|------------|-----------------|-----|------------|-----------------|-----|------------|-----------------|----|
| Age<br>standardized | Female                             | 2001(50.1) | 3.73(3.62–3.84) |    | 3074(50.8) | 3.04(2.94–3.14) |     | 999(50.1)  | 2.81(2.67–2.96) |     | 2682(55.5) | 2.73(2.64–2.82) |    |
|                     | <i>p</i> -value                    |            | <0.001          |    |            | <0.001          |     |            | <0.001          |     |            | <0.001          |    |
| Sex                 | Male                               | 1995(49.9) | 5.22(5.03–5.41) |    | 2976(49.2) | 4.02(3.87–4.17) |     | 996(49.9)  | 3.59(3.41–3.77) |     | 2149(44.5) | 3.79(3.65–3.93) |    |
|                     | Female                             | 2001(50.1) | 3.87(3.74–4.00) |    | 3074(50.8) | 3.16(3.05–3.27) |     | 999(50.1)  | 2.96(2.82–3.10) |     | 2682(55.5) | 2.80(2.70–2.90) |    |
|                     | <i>p</i> -value                    |            | <0.001          |    |            | <0.001          |     |            | <0.001          |     |            | <0.001          |    |
| Age(yr)             | 18–29                              | 789(19.7)  | 3.61(3.45–3.78) | a  | 1211(20.0) | 2.73(2.61–2.86) | a   | 412(20.7)  | 2.35(2.19–2.52) | a   | 598(12.4)  | 2.43(2.28–2.59) | a  |
|                     | 30–39                              | 804(20.1)  | 4.27(4.09–4.46) | b  | 1211(20.0) | 3.43(3.29–3.58) | b   | 401(20.1)  | 2.95(2.78–3.13) | b   | 842(17.4)  | 3.12(2.98–3.27) | b  |
|                     | 40–49                              | 800(20.0)  | 5.03(4.79–5.27) | cd | 1213(20.0) | 3.85(3.70–4.01) | c   | 391(19.6)  | 3.58(3.35–3.83) | c   | 937(19.4)  | 3.60(3.42–3.78) | c  |
|                     | 50–59                              | 791(19.8)  | 5.22(5.00–5.45) | c  | 1212(20.0) | 4.24(4.05–4.44) | d   | 404(20.3)  | 3.86(3.62–4.11) | c   | 969(20.1)  | 3.69(3.52–3.88) | c  |
|                     | 60–69                              | 492(12.3)  | 4.65(4.37–4.95) | bd | 1018(16.8) | 3.90(3.66–4.14) | cd  | 343(17.2)  | 3.75(3.49–4.03) | c   | 771(16.0)  | 3.60(3.38–3.84) | c  |
|                     | ≥70                                | 320(8.0)   | 4.36(3.99–4.76) | d  | 185(3.1)   | 3.59(3.16–4.07) | bcd | 44(2.2)    | 3.44(2.67–4.43) | abc | 714(14.8)  | 3.26(2.99–3.55) | bc |
|                     | <i>p</i> -value                    |            | <0.001          |    |            | <0.001          |     |            | <0.001          |     |            | <0.001          |    |
| Region              | Seoul/Gyeonggido/Incheon/gangwondo | 1884(47.1) | 4.22(4.09–4.36) | a  | 3264(54.0) | 3.29(3.19–3.38) | a   | 1112(55.7) | 2.96(2.83–3.10) | ab  | 2515(52.1) | 3.02(2.92–3.11) | a  |
|                     | Chungcheongdo                      | 476(11.9)  | 3.63(3.38–3.90) | b  | 576(9.5)   | 3.00(2.78–3.25) | a   | 227(11.4)  | 2.77(2.59–2.95) | a   | 600(12.4)  | 3.07(2.82–3.34) | a  |
|                     | Jeollado                           | 505(12.6)  | 4.50(4.24–4.79) | a  | 585(9.7)   | 3.35(3.08–3.65) | a   | 176(8.8)   | 3.46(3.08–3.88) | bc  | 505(10.5)  | 3.31(3.08–3.56) | a  |
|                     | Gyeongsangdo                       | 1052(26.3) | 5.43(5.14–5.73) | c  | 1507(24.9) | 4.46(4.20–4.73) | b   | 436(21.9)  | 4.17(3.87–4.49) | c   | 1111(23.0) | 3.90(3.65–4.17) | b  |
|                     | Jejudo                             | 79(2.0)    | 5.83(4.94–6.87) | c  | 118(2.0)   | 5.51(4.70–6.46) | b   | 44(2.2)    | 5.83(3.87–8.76) | c   | 100(2.1)   | 5.08(4.07–6.32) | b  |
|                     |                                    |            | <0.001          |    |            | <0.001          |     |            | <0.001          |     |            | <0.001          |    |
| Smoke               | Currently                          | 1034(26.0) | 4.65(4.46–4.85) |    | 1481(25.0) | 3.88(3.70–4.07) | a   | 464(24.6)  | 3.44(3.21–3.69) | a   | 923(19.4)  | 3.42(3.24–3.60) |    |
|                     | Former                             | 813(20.4)  | 4.58(4.34–4.83) |    | 1203(20.3) | 3.62(3.45–3.79) | ab  | 344(18.2)  | 3.64(3.37–3.94) | a   | 983(20.7)  | 3.28(3.10–3.46) |    |
|                     | Never                              | 2134(53.6) | 4.37(4.23–4.52) |    | 3232(54.6) | 3.39(3.28–3.51) | b   | 1080(57.2) | 3.06(2.92–3.21) | b   | 2853(59.9) | 3.18(3.07–3.29) |    |

|                 | <i>p</i> -value  |            | 0.057           |    | <0.001     |                 | 0.001 |            | 0.076           |        |
|-----------------|------------------|------------|-----------------|----|------------|-----------------|-------|------------|-----------------|--------|
| Drink           | Currently        | 2974(74.6) | 4.62(4.50–4.74) | a  | 4650(78.6) | 3.64(3.54–3.74) | a     | 1470(77.7) | 3.33(3.21–3.44) | a      |
|                 | Former           | 526(13.2)  | 3.96(3.77–4.15) | b  | 694(11.7)  | 3.10(2.92–3.30) | b     | 264(14.0)  | 2.94(2.73–3.18) | b      |
|                 | Never            | 485(12.2)  | 4.26(3.98–4.55) | ab | 574(9.7)   | 3.53(3.26–3.81) | a     | 157(8.3)   | 3.13(2.77–3.54) | ab     |
|                 | <i>p</i> -value  |            | <0.001          |    | <0.001     |                 |       | 0.014      |                 | <0.001 |
| House income    | Low              | 700(17.8)  | 4.13(3.92–4.36) | a  | 853(14.3)  | 3.30(3.09–3.52) | a     | 295(14.8)  | 2.99(2.74–3.27) | ab     |
|                 | Middle low       | 1007(25.7) | 4.28(4.12–4.44) | a  | 1594(26.7) | 3.39(3.25–3.53) | a     | 541(27.2)  | 2.90(2.75–3.07) | a      |
|                 | Middle high      | 1104(28.1) | 4.45(4.27–4.64) | a  | 1739(29.1) | 3.56(3.42–3.70) | a     | 554(27.9)  | 3.32(3.14–3.51) | b      |
|                 | High             | 1114(28.4) | 4.92(4.72–5.12) | b  | 1789(29.9) | 3.92(3.76–4.08) | b     | 597(30.0)  | 3.67(3.48–3.87) | c      |
|                 | <i>p</i> -value  |            | <0.001          |    | <0.001     |                 |       | <0.001     |                 | <0.001 |
| Education level | Below elementary | 874(22.0)  | 4.23(3.97–4.51) | a  | 977(16.5)  | 3.33(3.10–3.57) | a     | 300(15.9)  | 3.11(2.83–3.42) |        |
|                 | Middle           | 467(11.7)  | 4.44(4.17–4.71) | ab | 612(10.4)  | 3.64(3.43–3.86) | ab    | 171(9.0)   | 3.42(3.07–3.80) |        |
|                 | High             | 1498(37.6) | 4.41(4.28–4.55) | a  | 2237(37.9) | 3.50(3.38–3.63) | a     | 746(39.5)  | 3.15(3.01–3.30) |        |
|                 | Above college    | 1140(28.7) | 4.78(4.59–4.98) | b  | 2081(35.2) | 3.75(3.61–3.89) | b     | 674(35.6)  | 3.39(3.20–3.59) |        |
|                 | <i>p</i> -value  |            | 0.002           |    | 0.002      |                 |       | 0.076      |                 | 0.052  |

All estimates, except crude and age standardized, are adjusted by sex, age, house income, smoking status, drinking status, education level.

GM (95% CI): geometric means (95% confidence interval).

<sup>abc</sup>: Bonferroni post hoc grouping; estimates with the same letter are not significantly different.
